# Supplementary material
Source: Springer Nature journal article supplement (https://www.springermedizin.de/resource/supplementary/12884_2010_332_MOESM1_ESM.pdf/9457462)

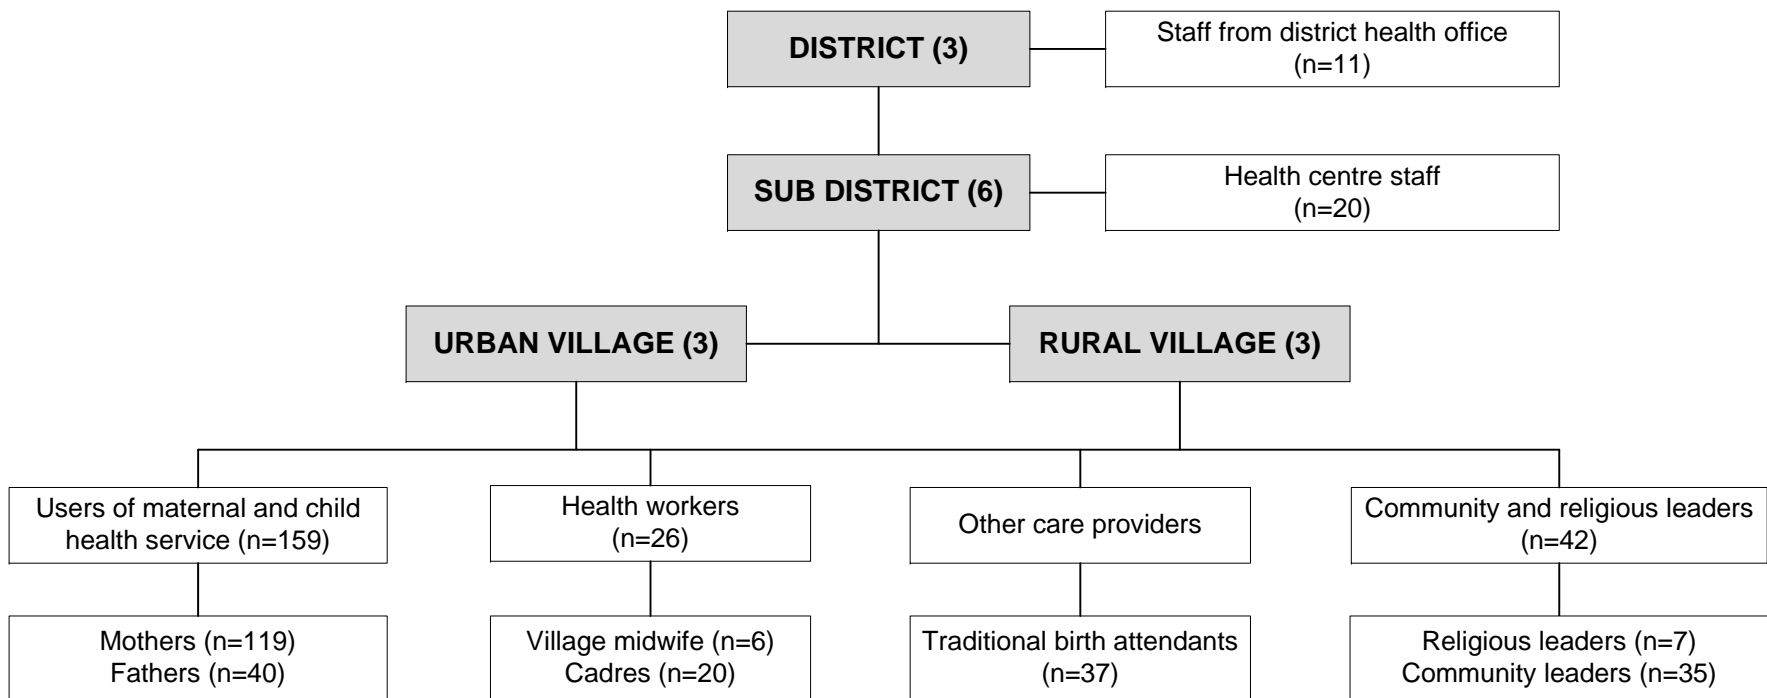

Supplement: MOESM1 [file 9457462]
